# Supplementary material
Source: publisher figshare collection journal article supplement (https://karger.figshare.com/articles/dataset/_/5241835)
Supplement: Supplementary file 2 [file 1]

Archive with 2 entries (2 files):
- 000437426_sm_Erratum.PDF
- 000437426_sm_Table.doc
